# Supplementary material
Source: Springer Nature journal article supplement (https://www.springermedizin.de/resource/supplementary/12885_2012_3767_MOESM3_ESM.pdf/9464372)

**A**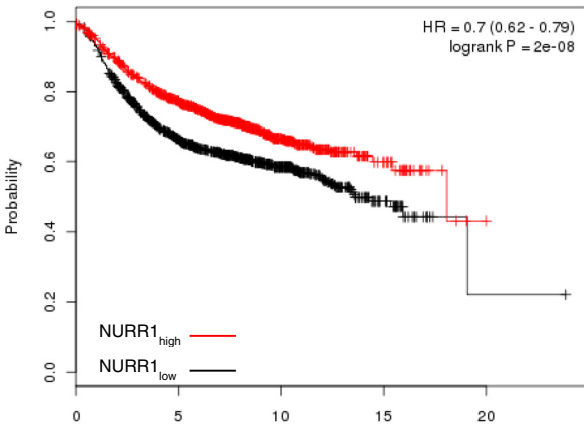**B**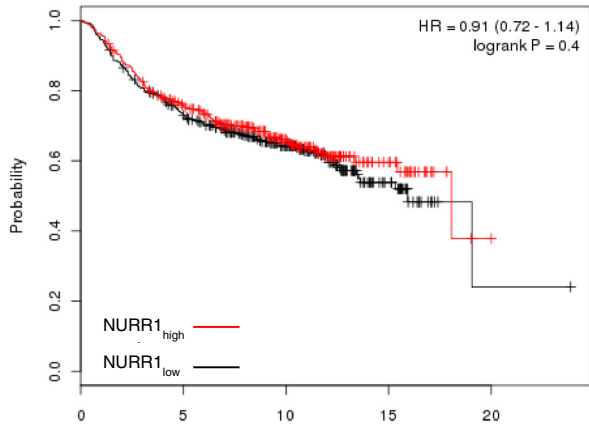

Years, Relapse Free Survival (RFS) in years

Supplement: MOESM3 [file 9464372]
